# Supplementary material
Source: ML conference proceedings conference paper supplement (https://openaccess.thecvf.com/content/ICCV2025/html/Ma_TinyViM_Frequency_Decoupling_ICCV_2025_paper.html)
Supplement: Supplementary file 1 [file Ma_TinyViM_Frequency_Decoupling_ICCV_2025_supplemental.pdf]

# TinyViM: Frequency Decoupling for Tiny Hybrid Vision Mamba

## Supplementary Material

Table A. Ablation for the number of Mamba blocks. Throughput is tested on a Nvidia V100 GPU with maximum power-of-two batch size that fits in memory.

| Variants              | Params     | GMACs      | Throu.      | Top-1       |
|-----------------------|------------|------------|-------------|-------------|
| Vim-Ti [15]           | 7.0        | 1.5        | 617         | 76.1        |
| EfficientVMamba-T [8] | 6.1        | 1.0        | 1396        | 76.5        |
| <b>TinyViM-S*</b>     | <b>6.2</b> | <b>0.9</b> | <b>2235</b> | <b>78.5</b> |
| <b>TinyViM-S</b>      | <b>5.6</b> | <b>0.9</b> | <b>2563</b> | <b>79.2</b> |

### 1. Dataset and Implementation Details

**ImageNet** [1] is a large image categorization dataset for computer vision research, containing about 1.2 million labeled images of about 1000 categories. All of our models are trained on the Imagenet-1k dataset for 300 epochs using the AdamW optimizer and an initial learning rate of  $2e^{-3}$ . We use an image resolution of  $224 \times 224$  for both training and testing. In addition, we use the same teacher model (i.e., the RegNetY-16GF model with a top-1 accuracy of 82.9%) as in [5, 11] for distillation. All experiments are conducted on 8 NVIDIA V100 GPUs and the throughput is tested with maximum power-of-two batch size that fits in memory.

**MS-COCO 2017** [7] is a large-scale real-world image and annotation dataset that contains 118K training and 5K validation images with 80 object classes. We use TinyViM as the backbone for feature extraction and apply the MaskRCNN [2] framework for object detection and instance segmentation. Similar to [5], we finetune our TinyViM for 12 epochs with an image resolution of  $1333 \times 800$  and batch size of 32. The AdamW optimizer is used with a learning rate of  $2e^{-4}$ . We report the performance for object detection and instance segmentation in terms of mean average precision (mAP).

**ADE20K** [14] is a challenging segmentation dataset, which contains about 20,000 images and covers 150 categories. We apply the ImageNet pre-trained TinyViM as backbone to extract image features and Semantic FPN [4] as decode head for segmentation. Following [5, 11], we train the segmentation model with an image size of  $512 \times 512$  and a batch size of 32 for 40K iterations. The AdamW optimizer with poly learning rate scheduling is applied and the initial learning rate is  $2e^{-4}$ . The semantic segmentation performance is reported with the mean intersection over union (mIoU) metric.

### 2. Model Configuration

We give the detailed architectural configuration of the TinyViM variant in Table A, which details each building

block of the model variant and the corresponding hyperparameters. We mainly place the proposed TinyViM blocks at the end of each stage to capture the global context-enhanced features. For the third stage, we additionally place a TinyViM in the middle of the stage to obtain a better balance between accuracy and efficiency, and the effectiveness of this design of setting up more and larger blocks in the third stage has been confirmed by previous works [9, 13]. In addition, we set the downsampling ratios in TinyViM Blocks of the four stages from small to large to 8, 4, 2 and 1, respectively. In other words, the resolution of the feature maps input to Mamba block at each stage is  $1/32$  of the original images.

### 3. More Comparison Results

#### 3.1. Qualitative results on ADE20K

We visualized the result of segmentation on ADE20K, 053 which is shown in Fig. A. It can be found that the segmen- 054 tation result of TinyViM is very close to the label. The cate- 055 gories and boundaries of objects are accurately segmented. 056 These visualizations demonstrate the state- 057 of-the-art perfor- 058 mance of TinyViM in semantic seg- 059 mentation

#### 3.2. Qualitative results on MS-COCO

The detection and instance segmentation results on coco are 060 visualized in Fig. B. It can be observed that the peo- 061 ple and animals in the image are accurately segmented. The 062 location of the detection box is also very accurate. These 063 visualization results show that TinyViM achieves 064 advanced 065 performance in both instance segmentation and detection 066 tasks.

### 4. Efficiency Analysis

We attribute the efficiency of TinyViM to two reasons: 1, the combination of mobile-friendly convolution and 2, the efficient laplace mixer design. For the former, we are not obsessed with designing a pure Mamba architecture such as ViM [15]. The inductive bias and mobile-friendliness of convolution make it naturally suitable for lightweight backbones. As a result, pure Convolution [3, 10, 13] or Convolution-ViT [5, 6, 11] models dominate the current lightweight backbone family. Inspired by these excellent Convolutional-ViT hybrid model [5, 6, 11, 12], we design the Convolution-Mamba hybrid architecture TinyViM. For the latter, we propose a variant TinyViM-S\* to explore the impact of our reduced number of Mamba blocks on model

Table A. Our detailed model variants for ImageNet-1k, which describe the model configurations at each stage including the numbers of Local Block and TinyViM Block, the output channels and the resolution of the output features. In addition, the expansion factor for FFN in both Local Block and TinyViM Block defaults to 4.

| Name                           | Output         | Small                                                       | Base                                                        | Large                                                        |
|--------------------------------|----------------|-------------------------------------------------------------|-------------------------------------------------------------|--------------------------------------------------------------|
| stem                           | $56 \times 56$ | [RepDW-3 $\times$ 2, stride=2]                              |                                                             |                                                              |
| stage1                         | $56 \times 56$ | [Local Block $\times$ 2, d=48<br>TinyViM Block $\times$ 1]  | [Local Block $\times$ 3, d=48<br>TinyViM Block $\times$ 1]  | [Local Block $\times$ 3, d=64<br>TinyViM Block $\times$ 1]   |
| [RepDW-3 $\times$ 1, stride=2] |                |                                                             |                                                             |                                                              |
| stage2                         | $28 \times 28$ | [Local Block $\times$ 2, d=64<br>TinyViM Block $\times$ 1]  | [Local Block $\times$ 2, d=96<br>TinyViM Block $\times$ 1]  | [Local Block $\times$ 3, d=128<br>TinyViM Block $\times$ 1]  |
| [RepDW-3 $\times$ 1, stride=2] |                |                                                             |                                                             |                                                              |
| stage3                         | $14 \times 14$ | [Local Block $\times$ 7, d=168<br>TinyViM Block $\times$ 2] | [Local Block $\times$ 8, d=192<br>TinyViM Block $\times$ 2] | [Local Block $\times$ 10, d=384<br>TinyViM Block $\times$ 2] |
| [RepDW-3 $\times$ 1, stride=2] |                |                                                             |                                                             |                                                              |
| stage4                         | $7 \times 7$   | [Local Block $\times$ 5, d=224<br>TinyViM Block $\times$ 1] | [Local Block $\times$ 4, d=384<br>TinyViM Block $\times$ 1] | [Local Block $\times$ 5, d=512<br>TinyViM Block $\times$ 1]  |
| Classifier                     | $1 \times 1$   | Average pool, 1000d fully-connected                         |                                                             |                                                              |
| GFLOPs                         |                | 0.9G                                                        | 1.5G                                                        | 4.7G                                                         |
| Params                         |                | 5.6M                                                        | 11.0M                                                       | 31.7M                                                        |

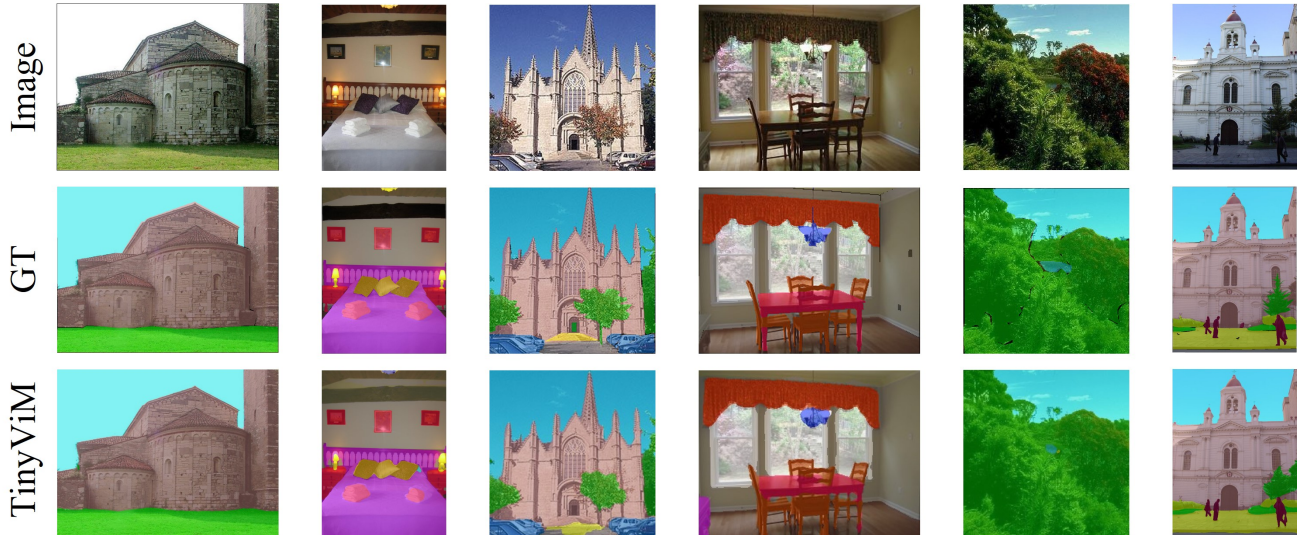

Figure A. Visualization of the detection and instance segmentation predictions on COCO. It shows that TinyViM can accurately localize and segment various objects in complex scenes.



residuals and linear bottlenecks. In *Proceedings of the IEEE Conference on Computer Vision and Pattern Recognition (CVPR)*, 2018. [1](#)

- [11] Abdelrahman Shaker, Muhammad Maaz, Hanoona Rasheed, Salman Khan, Ming-Hsuan Yang, and Fahad Shahbaz Khan. Swiftformer: Efficient additive attention for transformer-based real-time mobile vision applications. In *Proceedings of the IEEE/CVF International Conference on Computer Vision (ICCV)*, pages 17425–17436, 2023. [1](#)
- [12] Pavan Kumar Anasosalu Vasu, James Gabriel, Jeff Zhu, Oncel Tuzel, and Anurag Ranjan. Fastvit: A fast hybrid vision transformer using structural reparameterization. In *Proceedings of the IEEE/CVF International Conference on Computer Vision (ICCV)*, pages 5785–5795, 2023. [1](#)
- [13] Ao Wang, Hui Chen, Zijia Lin, Jungong Han, and Guiguang Ding. Repvit: Revisiting mobile cnn from vit perspective. In *Proceedings of the IEEE/CVF Conference on Computer Vision and Pattern Recognition (CVPR)*, pages 15909–15920, 2024. [1](#)
- [14] Bolei Zhou, Hang Zhao, Xavier Puig, Sanja Fidler, Adela Barriuso, and Antonio Torralba. Scene parsing through ade20k dataset. In *Proceedings of the IEEE conference on computer vision and pattern recognition*, pages 633–641, 2017. [1](#)
- [15] Lianghui Zhu, Bencheng Liao, Qian Zhang, Xinlong Wang, Wenyu Liu, and Xinggang Wang. Vision mamba: Efficient visual representation learning with bidirectional state space model. In *Forty-first International Conference on Machine Learning*. [1](#)
